1 **FULL TITLE:** Spatial epidemiology of Japanese encephalitis virus and other infections of the central  
2 nervous system in Lao PDR (2003 – 2011): a retrospective analysis

3  
4 **SHORT TITLE:** Spatial epidemiology of central nervous system infection in Lao PDR

5  
6 Sayaphet Rattanavong<sup>1</sup>, Audrey Dubot-Pérés<sup>1,2,3</sup>, Mayfong Mayxay<sup>1,2,4</sup>, Manivanh Vongsouvath<sup>1</sup>, Sue J  
7 Lee<sup>2,5</sup>, Julien Cappelle<sup>6,7,8,9</sup>, Paul N. Newton<sup>1,2,5</sup>, Daniel M. Parker<sup>10,11</sup>

8  
9  
10  
11 Sayaphet Rattanavong: [Sayaphet@tropmedres.ac](mailto:Sayaphet@tropmedres.ac)

12 Audrey Dubot-Pérés: [Audrey@tropmedres.ac](mailto:Audrey@tropmedres.ac)

13 Mayfong Mayxay: [Mayfong@tropmedres.ac](mailto:Mayfong@tropmedres.ac)

14 Manivanh Vongsouvath: [Manivanh@tropmedres.ac](mailto:Manivanh@tropmedres.ac)

15 Sue J Lee: [Sue@tropmedres.ac](mailto:Sue@tropmedres.ac)

16 Julien Cappelle: [Julien.cappelle@cirad.fr](mailto:Julien.cappelle@cirad.fr)

17 Paul N. Newton: [Paul.Newton@tropmedres.ac](mailto:Paul.Newton@tropmedres.ac)

18 \*Daniel M. Parker: [Dparker1@uci.edu](mailto:Dparker1@uci.edu)

19  
20 \*corresponding author

21  
22 1. Lao-Oxford-Mahosot Hospital-Wellcome Trust Research Unit (LOMWRU), Microbiology Laboratory,  
23 Mahosot Hospital, Vientiane, Lao PDR

24 2. Centre for Tropical Medicine and Global Health, Nuffield Department of Clinical Medicine, University  
25 of Oxford, Churchill Hospital, Oxford, U.K.

26 3. Unité des Virus Émergents (UVE: Aix-Marseille Univ – IRD 190 – Inserm 1207 – IHU Méditerranée  
27 Infection), Marseille, France

28 4. Institute of Research and Education Development, University of Health Sciences, Vientiane, Lao PDR

29 5. Mahidol-Oxford Tropical Medicine Research Unit, Faculty of Tropical Medicine, Mahidol University,  
30 Thailand

31 6. Epidemiology and Public Health Unit, Institut Pasteur du Cambodge, Phnom Penh, Cambodia.

32 7. CIRAD, UMR ASTRE, F-34398, Montpellier, France

33 8. UMR ASTRE, CIRAD, INRA, Montpellier University, F-34398, Montpellier, France.

34 9. UMR EpiA, INRA, VetAgro Sup, F-69280, Marcy l’Etoile, France.

35 10. Department of Population Health and Disease Prevention, University of California, Irvine, U.S.A.

36 11. Department of Epidemiology, School of Medicine, University of California, Irvine, U.S.A.

37

38

39

40

41

42

43

44

45

46

47

48 **ABSTRACT**

49 **Background.** Central nervous system (CNS) infections are important contributors to morbidity and  
50 mortality and the causative agents for ~50% patients are never identified. The causative agents of some  
51 CNS infections have distinct spatial and temporal patterns.

52 **Methodology/Principal Findings.** Here we present the results of a spatial epidemiological and  
53 ecological analysis of CNS infections in Lao PDR (2003 – 2011). The data came from hospitalizations for  
54 suspected CNS infection at Mahosot Hospital in Vientiane. Out of 1,065 patients, 450 were assigned a  
55 confirmed diagnosis. While many communities in Lao PDR are in rural and remote locations, most  
56 patients in these data came from villages along major roads. Japanese encephalitis virus ((JEV); n=94)  
57 and *Cryptococcus* spp. (n=70) were the most common infections. JEV infections peaked in the rainy  
58 season and JEV patients came from villages with higher surface flooding during the same month as  
59 admission. JEV infections were spatially dispersed throughout rural areas and were most common in  
60 children. *Cryptococcus* spp. infections clustered near Vientiane (an urban area) and among adults.

61 **Conclusions/Significance.** The spatial and temporal patterns identified in this analysis are related to  
62 complex environmental, social, and geographic factors. For example, JEV infected patients came from  
63 locations with environmental conditions (surface water) that are suitable to support larger mosquito  
64 vector populations. Most patients in these data came from villages that are near major roads; likely the  
65 result of geographic and financial access to healthcare and also indicating that CNS diseases are  
66 underestimated in the region (especially from more remote areas). As Lao PDR is undergoing major  
67 developmental and environmental changes, the space-time distributions of the causative agents of CNS  
68 infection will also likely change. There is a major need for increased diagnostic abilities; increased access  
69 to healthcare, especially for rural populations; and for increased surveillance throughout the nation.

70

71

72 **AUTHOR SUMMARY**

73 Infections of the central nervous system (CNS) are important with regard to public health. However  
74 many CNS infections are never diagnosed. In this analysis we investigated spatial and temporal patterns  
75 in hospitalized patients with suspected CNS infections in Lao PDR. We found that patients were most  
76 likely to come from villages located along major roads and highways. Patients from remote areas may  
77 have more difficulty reaching healthcare facilities. The most commonly diagnosed infection in these  
78 patients was Japanese encephalitis virus (JEV). Patients with this disease came from locations that were  
79 optimal for the mosquito vectors that spread JEV, rural areas with surface water and during the rainy  
80 season. Our analyses suggest that CNS infections should be a priority for public health workers in the  
81 region. Diagnostic capabilities should be increased throughout the nation; surveillance efforts should be  
82 broadened; and efforts should be increased toward providing easy access to healthcare for rural and  
83 remote populations.

84

85

86

87

88

89

90

91

92

93

94

95

## 96 INTRODUCTION

97 Numerous illnesses go undiagnosed and the causative agents of many infections are never  
98 identified. In regions where access to healthcare facilities is limited and where diagnostic capabilities are  
99 few, a smaller proportion of diseases are objectively diagnosed. Diseases with mild symptoms may more  
100 frequently go untreated, but in some areas even severe illnesses commonly go undiagnosed and  
101 untreated. Infections of the central nervous system (CNS) can be particularly severe, affecting the brain  
102 and/or spinal cord and/or the surrounding meninges, frequently resulting in death.

103 Pathogens that invade and infect the CNS include viruses, bacteria, fungi, parasites, and prions.  
104 As with other infections, the causative agent(s) of many CNS infections are never determined  
105 (frequently <50%) [1–3]. Symptoms of CNS infection can range widely, even for single causative agents,  
106 leading to further difficulties with diagnosis. Diagnoses are frequently presumptive and non-specific (i.e.  
107 meningitis is often presumed to be caused by bacteria whereas encephalitis is presumed to be caused  
108 viruses [2,4–6]). Some causative agents are specific to regions (e.g. Japanese Encephalitis, Saint Louis  
109 Encephalitis, Rift Valley Fever Viruses) and exhibit seasonal fluctuations (e.g. vector borne infections),  
110 therefore geography and seasonality can facilitate presumptive diagnosis of CNS diseases [4,7].

111 In Southeast (SE) Asia, CNS infections are increasingly recognized as important contributors to  
112 morbidity and mortality [1,8,9]. However, detailed medical and epidemiological data are frequently  
113 lacking, especially for low income nations and from remote areas within middle-to-high income nations.  
114 Known important viral CNS infections in SE Asia include Japanese encephalitis, dengue, and rabies  
115 viruses [1]. Important bacterial CNS infections include *Streptococcus pneumoniae*, *Haemophilus*  
116 *influenzae*, *S. suis*, *Mycobacterium tuberculosis* and *Neisseria meningitidis*. *Orientia tsutsugamushi*,  
117 *Rickettsia typhi* and *Leptospira* spp. are increasingly recognized as important causes [9]. Detailed  
118 analyses that confirm the cause of CNS related infections or assess their spatial and temporal  
119 distribution in the region are rare [8–11,14].

120

121           We recently published the results of a study of the etiology and impact of CNS infections  
122 diagnosed among 1,065 patients at Mahosot Hospital, Vientiane, Lao PDR [14]. The goal of this  
123 secondary analysis was to investigate the spatial distribution(s) of CNS-related infections; to look for  
124 differential spatial distributions for major causative agents; and to explore potential geographic,  
125 demographic, and environmental correlates of these infections.

## 126 **DATA AND METHODS**

### 127 ***Data sources, processing and merging***

128           Data used in this research were compiled from four main sources (**Supporting Figure 1**). The  
129 epidemiological data come from an 8-year research project on CNS infections in Lao PDR from all  
130 patients who received diagnostic lumbar puncture (LP) at Mahosot Hospital in Vientiane, Lao PDR  
131 between January 2003 and August 2011 and consenting to participate [14]. All patients were admitted  
132 to the hospital because of suspected CNS infection and Mahosot Hospital is the only medical facility in  
133 Lao PDR capable of performing diagnostic LP and cerebral spinal fluid (CSF) analysis. Tests for a large  
134 panel of pathogens were performed at the Microbiology Laboratory following international standards  
135 (details provided in **Supporting Materials I** and [14]). Demographic (age, gender, ethnicity) and  
136 geographic (home village) characteristics of patients were recorded in the database.

137           The epidemiological data were used to create two separate datasets: One aggregated at the  
138 village level (one row per location) and another was maintained at the individual level, with one row per  
139 individual. The official Lao PDR censuses from 2005 and 2015 were used to geocode villages (based on  
140 village name and administrative units listed in patient records) and to assign village population  
141 estimates to each village (taking a mean population size between 2005 and 2015). Village location and  
142 population sizes were then merged to both the individual- and village-level datasets.

143 A subset of villages within the geographic region of the home villages of included patients was  
144 selected by overlaying a standard deviational ellipse with 3 standard deviations (calculations described  
145 in **Supporting Materials II**) around the patient home villages and then selecting all villages within that  
146 ellipse (**Supporting Figure 2**). These villages were then retained for village level comparisons between  
147 villages populated, and not populated, with patients admitted with CNS disease needing an LP. This  
148 subset of villages is hereafter referred to as the “study area”.

149 Major road network data was taken from OpenStreetMaps (<http://www.openstreetmap.la>),  
150 selecting “primary”, “secondary”, and all major connecting roads (downloaded in February 2017,  
151 **Supporting Figure 3**). Primary and secondary roads are the two largest road classifications for the  
152 nation. Primary roads link major towns and cities and secondary roads link mid-sized towns. Primary and  
153 secondary link roads are ramps or slip roads that connect other roads to primary or secondary roads.  
154 Together, these types of roads are hereafter referred to as “major roads”. Smaller roads were not  
155 included in this analysis as they are less likely to be accurately included in the OpenStreetMaps data. The  
156 Euclidian distance was then calculated from all villages in the census to the nearest point along a major  
157 road. These distances were merged to both the village- and the individual-level datasets.

158 Environmental predictor variables for vegetation and surface water were derived from  
159 Moderate Resolution Imaging Spectroradiometer (MODIS) products (MOD13Q1/MYD13Q1 250 meter  
160 AQUA/TERRA 16 day composites). Since many infectious diseases, especially vector borne diseases, are  
161 strongly influenced by environmental factors we hypothesized that indicators of vegetation and surface  
162 flooding would correlate with some specific diagnoses. Three environmental indices were downloaded  
163 and considered in these analyses: a normalized flooding index (NFI) [15]; the normalized difference  
164 vegetative index (NDVI); and the enhanced vegetation index (EVI). NFI is indicative of surface water,  
165 NDVI is indicative of green surface vegetation, and EVI is an improved measure of green vegetation that  
166 is intended to account for dense forest canopies and atmospheric conditions that can lead to error in

167 NDVI measurements. Data were downloaded for each of these environmental indices (EI) within each  
168 16-day time period from February 2002 through December of 2011. The final analyses conducted in this  
169 research retained only the EVI and NFI for environmental predictors (summary statistics for NDVI are  
170 included) because NDVI and EVI were strongly correlated. The EIs are described in more detail in

### 171 **Supporting Materials III.**

172 The environmental raster data were then summarized and extracted based on varying buffer  
173 sizes (2km, 5km, and 10km) for each village in the individual- and village-level datasets. Permanent  
174 water bodies (such as the Mekong River and Nam Ngum Dam) were masked from the NFI calculations.  
175 For the village-level datasets, mean values of each environmental variable was calculated for the study  
176 period duration and used as an indicator of “average” vegetation or surface water characteristics of  
177 each village. For the individual-level dataset the values were extracted based on the admission date,  
178 using increasing durations of time prior to admission (within the same month, within the previous 2  
179 months, within the previous year).

180 The final datasets include the village-level data, that is a subsample of 98% of all villages with  
181 patients included in the study and the other census designated villages within the same region (the  
182 study area), and the individual level dataset that includes all patients included in the study. Variables  
183 used in this analysis and their descriptions are listed in **Table 1**.

### 184 ***Exploratory spatial data analysis***

185 Summary statistics (median; Q1:Q3; mean) were calculated for the distances between villages  
186 and the nearest major road, and aggregated by whether or not the village was home to included  
187 patients and by specific diagnoses. Summary statistics (mean and 95% confidence intervals) were also  
188 calculated for all environmental variables, at each buffer size and temporal resolution, and for each of  
189 the major diagnoses. Tukey’s post hoc range test was used to assess statistically significant differences in  
190 environmental indices across diagnoses.

191 Standard distance deviations (SDDs) and standard deviation ellipses (SDEs) were calculated  
192 (details in **Supporting Materials II**) and mapped to measure and visually analyze the central tendency  
193 and spatial distributions for all patient home villages and by each of the major single (mono-infection)  
194 diagnoses.

### 195 **Formal analyses**

196 Multivariable regressions were used to calculate model-adjusted odds ratios and confidence  
197 intervals. The regressions at the village level focused on study patient villages and the home villages of  
198 JEV diagnosed patients. A multivariable regression was also done at the individual level focusing on JEV  
199 infected patients. Other diagnoses were not included in these analyses because of small numbers of  
200 cases per village.

201 Logistic generalized additive models (GAMs) were used for variable selection and specification  
202 (detailed in **Supporting Materials IV and in Table 1**) for the final models. The GAMs were used to  
203 examine different specifications of the continuous environmental, geographic, and demographic  
204 variables and for changes in model fit and strength of association across buffer sizes (i.e. 2km, 5km, or  
205 10km buffers) and for different time durations for EI measurements (i.e. same month, 2 months prior,  
206 12 months prior to hospital admission). The final model covariates were chosen based on a combination  
207 of *a priori* hypotheses, model fit (using the Akaike information criterion), and strength of association  
208 between the covariate and the model outcome variable.

209 The final model for the individual-level analysis was a generalized logistic mixed model with a  
210 random effect for home village. The final model for the village-level analysis was a logistic regression.

### 211 **Software**

212 All maps were created using QGIS version 3.4.9. R cran version 3.5.2 was used for downloading,  
213 processing, and wrangling MODIS data (using the “MODISStsp”; “raster”; “rgdal”; and “maptools”  
214 packages) and for all regressions. The “mgcv” package was used for GAMs and the lme4 package was



215 used for the generalized mixed models. Euclidian distances between villages and major roads were  
216 calculated using QGIS. ArcMap version 10.5.1 was used to calculate SDDs and SDEs.

### 217 ***Ethics approval***

218 Ethical clearance for the CNS study was granted by the Oxford University Tropical Ethics  
219 Research Committee and by the Ethical Review Committee of the Faculty of Medical Sciences, National  
220 University of Laos. Between 2003 and 2006, both Oxford Tropical Ethics Committee and the Ethical  
221 Review Committee of the Faculty of Medical Sciences, National University of Laos, approved the use of  
222 oral witnessed consent. Oral consent was confirmed by a signed witness statement. Verbal consent  
223 (from 2003 – 2006) and written consent (from 2006 – 2011) were obtained from all recruited patients or  
224 immediate relatives. All ages were included provided that they or their guardian gave witnesses oral  
225 informed consent (2003 – 2006) and written informed consent since 2006.

## 226 **RESULTS**

### 227 ***Summary statistics***

228 A total of 1,065 patients were recruited with no LP contraindications and consented to have a  
229 diagnostic LP; 450 (42%) were assigned a final laboratory diagnosis. The most common of these were  
230 Japanese encephalitis virus (JEV) 94 individuals); followed by *Cryptococcus* spp. with 70 individuals (9  
231 were *C. gattii*); scrub typhus (*Orientia tsutsugamushi*) 31; Dengue virus 27; *Leptospira* spp. 25; murine  
232 typhus (*Rickettsia typhi*) 24; *Streptococcus pneumoniae* in 22 and 20 with *Mycobacterium tuberculosis*.  
233 124 patients died prior to discharge (out of 893 with recorded discharge type recorded).

234 The majority (666, 63%) of patients were male, with the lowest sex bias in cryptococcal  
235 infections (40/70, 57% male) and the highest among dengue infections (22/27, 82% male) (**Table 2**). Age  
236 patterns were evident in JEV and cryptococcal infections, with median ages of 13 and 33 years,  
237 respectively (**Table 2**). Patients were linked to 582 different villages (multiple patients could come from  
238 the same village): 90 villages with JEV patients, 66 with cryptococcal patients, 31 with scrub typhus

239 patients, 27 with dengue patients, 24 with leptospiral patients, and 24 with murine typhus patients. The  
240 majority (870, 82%) of patients came from within Vientiane Prefecture (678, 64%) or Vientiane Province  
241 (192, 18%).

242 A total of 6,416 villages (of 10,520 recorded in 2005 [16]) were selected as the study area for  
243 further village level analyses (**Table 3**). Villages that were home to study patients were 11 times (0.7km  
244 versus 6.3km, from **Table 3**) closer to a major road when compared to other villages within the study  
245 area. Scrub typhus and JEV infected patient homes were further from major roads than other patients,  
246 but the difference was not statistically significant in univariate analyses.

247 The home villages of JEV patients were more broadly dispersed (**Figure 1B**) than for patients  
248 with other etiologies (**Figure 1C**), evident from the circular, larger SDE and SDD. The distribution of these  
249 JEV patient home villages was also relatively isotropic, with the SDE and SDD being nearly identical.  
250 Conversely, patients with cryptococcal infections were clustered near Vientiane City and along the road  
251 leading North/Northwest from the urban center (**Figure 1C**). Scrub typhus and murine typhus infections  
252 were also both clustered around Vientiane City but showed perpendicular spatial distributions  
253 (**Supporting Figures 4D and 4G**) a pattern previously described from IgG seropositivity data from  
254 Vientiane City [17]).

### 255 ***Characteristics of patient home villages***

256 Mean NFI values for the 2km radius tended to be higher than for either the 5km or 10km radius  
257 as surface flooding is heterogeneous and taking a mean across larger radii dilutes the measurement. The  
258 opposite pattern was observed for both vegetation indices. The 2km radius for both mean NDVI and  
259 mean EVI was usually smaller than at 5km or 10km radii (**Figures 2 and 3**).

260 Study patient villages had higher mean NFI values than non-study patient villages (**Figure 2A**)  
261 (non-study patient villages are those in the same study area as study patient villages but were not home  
262 to a study patient). The home villages of study patients diagnosed with *dengue virus* and cryptococcal

263 infections had high mean NFI values over the duration of the study period when compared to other  
264 major diagnoses (**Figure 2A**).

265 Conversely, the home villages of study patients tended to have lower mean EVI values than non-  
266 study patient villages (**Figure 2C**). Villages from which patients who were diagnosed with JEV were an  
267 exception to this general pattern. JEV patient home villages had higher mean EVI when compared to  
268 home villages of patients with dengue and cryptococcal infections (**Figure 2C**).

269 Home villages of patients with JEV diagnoses had lower mean NFI over the duration of the study  
270 period, but had higher NFI than other major diagnoses when looking specifically at the month of  
271 admission (especially when compared to cryptococcal infections and murine typhus (**Figure 3A**)). JEV  
272 patient home villages also had higher EVI during the month of admission than most other mono-  
273 infections, especially when compared to either cryptococcal infections or murine typhus (**Figure 3C**).  
274 Scrub typhus infections had higher EVI than cryptococcal infections when the measurement was taken  
275 at the 10km radius buffer (not detectable at smaller radii (**Figure 3C**)).

276 Home villages of patients with dengue infections had higher NFI than murine typhus or  
277 *Cryptococcus* spp. patient home villages when considering the 2 months prior to admission (**Figure 3D**).  
278 *Cryptococcus* spp. patient home villages had particularly low EVI in the two months leading up to  
279 admission, especially when compared to JEV and *Leptospira* spp. patient home villages (**Figure 3F**).  
280 At one year prior to admission both *Cryptococcus* spp. patient home and *dengue virus* patient home  
281 villages had higher NFI than JEV patient home villages (**Figure 3G**).

### 282 ***Logistic regressions for geographic, environmental and demographic predictors of CNS infections***

283 In agreement with univariate analyses, villages from which study patients came tended to be  
284 larger in population size (**Supporting Figure 4**), lower in elevation (**Supporting Figure 5**), and closer to a  
285 major road when compared to other villages within the study area (**Table 4**). They also had higher mean  
286 levels of surface flooding, with villages in the highest NFI quadrant having over two times the odds (AOR:

287 2.21; CI: 1.49 – 3.31) of being a home village for study patients when compared to neighboring villages  
288 in the study area (**Table 4 and Figure 2**). Villages from which JEV patients originated had few defining  
289 characteristics in the logistic regression, other than being larger in population size (AOR: 1.74; CI: 1.55 –  
290 1.96) and at lower elevations (AOR: 0.69; CI: 0.46 – 0.97) than non-study patient villages (**Table 5**).

291 In the individual-level analysis (**Table 6**), age and season were the strongest predictors of JEV  
292 infections among all patients. Patients who were admitted between July and September had over seven  
293 times the odds (AOR: 7.40; CI: 1.45 – 37.67) of being diagnosed with JEV when compared to patients  
294 who were admitted between January and March (**Table 6**). JEV was most common in children aged 5  
295 through 14 (AOR: 2.74; CI: 1.31 – 5.69; ages 0 – 4 as the comparison group). NFI during the month of  
296 admission (10km buffer used in the regression) was also a strong predictor of JEV infection. Individuals  
297 who came from villages in the highest quadrant of NFI measurements had approximately 3 times the  
298 odds being diagnosed with JEV (AOR: 3.06; CI: 1.04 – 8.96). While study patients came from villages with  
299 lower mean elevations, patients who were diagnosed with JEV came from higher elevation villages in  
300 comparison to the other patients (AOR: 1.36; CI: 1.11 – 1.66). EVI was a significant predictor in models  
301 that did not include distance to road, village population, and elevation (**Table 6 M1 and M2**).

## 302 **DISCUSSION**

303 Patients from this study were recruited based on symptomology and a medical procedure that is  
304 only available at a single location in the nation (diagnostic LP at Mahosot Hospital, Vientiane). The home  
305 villages of all included study patients, regardless of diagnosis, were approximately centered on Vientiane  
306 City and were closer to major roads than would be expected by chance alone. For many of the infections  
307 studied in this analysis, this association is likely more related to geographic and financial access to  
308 healthcare systems rather than exposure to environmental risk factors – especially for infections that  
309 are more associated with rural areas (e.g. JEV). This finding also suggests that the results here may be a  
310 vast underestimate of the true burden of CNS infections, with much of the Lao population not being in

311 near proximity to a major road (**Table 3**). The causative agents of CNS infections differ in biology,  
312 ecology, and geography, and this is evident through the spatial distributions of the home villages of  
313 patients. The geographic, environmental, and demographic patterns exhibited by patients needing a  
314 diagnostic LP for suspected CNS infections, and for specific diagnoses, are the result of complex  
315 overlapping factors.

316 A similar spatial pattern was described from an epidemiological analysis of CNS infections  
317 among children admitted to Ho Chi Minh City hospitals in Vietnam – with most patients coming from  
318 districts near the hospital [18]. While the majority of infections (55%) in the Vietnam study were  
319 presumed to be bacterial in origin, in this study from Lao PDR bacterial infections were identified in only  
320 38% (170 out of 450 patients with diagnoses).

321 JEV was the single largest identified cause of CNS infections in these data; it primarily affected  
322 children (median 13 years of age, **Table 2**), occurred predominantly during the rainy season (likely  
323 corresponding to peaks in mosquito vector populations), and in villages with recent high levels of  
324 surface water [19]. JEV is a vaccine-preventable disease, but the vaccine has historically been expensive  
325 and vaccine programs are frequently limited by access to remote communities. In 2013 the WHO  
326 approved a less expensive vaccine (produced in China by the Chengdu Institute of Biological Products)  
327 which has since been used in mass vaccination campaigns in Lao PDR in 2013 and 2015 [20]. The vaccine  
328 is now routinely given to all children less than 9 months of age but coverage may be low in some areas.

329 The second largest contributor to CNS diseases were cryptococcal infections, which are  
330 opportunistic fungal infections with high mortality [21]. Of the 70 patients with cryptococcal infections,  
331 12 died prior to discharge and another 8 likely died at home after leaving the hospital. Cryptococcal  
332 infections are generally acquired after inhalation of the yeast-like form of the fungus which has been  
333 associated with several ecological habitats (*Cryptococcus gattii* has been associated with over 50 species  
334 of trees; *Cryptococcus neoformans* has been associated with bird droppings but is also suspected to be

335 associated with plants [22,23]). This disease has a long incubation period [24,25] and while *C. gattii*  
336 infections commonly occur among immunocompetent individuals, *C. neoformans* infections are  
337 frequently associated with HIV infections [26,27]. In these data, 20 of the patients diagnosed with  
338 cryptococcal infections also had HIV infections. While several studies have shown that cryptococcal  
339 species exist in specific ecological habitats and have inferred environmental exposure, the long  
340 incubation period and complex natural history likely obfuscate ecological correlations.

341           There are several limitations to this research. Diagnostic LPs are only conducted in Mahosot  
342 Hospital in the national capital. Logistical and financial difficulties in accessing healthcare facilities, and  
343 especially for etiological diagnostic capabilities, likely leads to severe under-reporting of meningitis,  
344 encephalitis, or in the diagnosing the causative agent in these conditions when the patient does access  
345 care. All of these factors ultimately lead to small case counts for numerous different causative agents.  
346 The spatial patterns in points (villages) and ellipses exhibited in these data are likely influenced by the  
347 shape of the nation and it is possible that the point patterns and ellipses would differ if we had data  
348 from neighboring nations. Spatial and temporal patterns that differentiate different infections might be  
349 more obvious if the surveillance system instead focused on any symptomatic infections (rather than only  
350 suspected infections of the CNS). Some pathogens are neurotropic whereas others have tropism for  
351 other organs, while being capable of occasionally infecting the CNS. This may partially explain the higher  
352 case counts of JEV and why we were able to identify spatial, temporal, and environmental predictors for  
353 this causative agent.

354           OpenStreetMaps data are volunteered data and may be prone to error. For this reason we  
355 focused on major roads, whose routes have changed very little over the last decades. For the  
356 regressions, the distances from all villages to the nearest major road was also rounded to the nearest  
357 5km. Examination of satellite imagery in comparison with the major roads from OpenStreetMaps  
358 suggests that where error does exist, it is on a scale of  $\pm 100$  meters, meaning that measurements of

359 distances, as used in this analysis, should not be strongly influenced. Some of these data now come from  
360 over a decade ago. Surveillance systems of this type (based on relatively vague symptomology), with a  
361 wide panel of possible contributing causative agents, and necessary intensive laboratory components  
362 are extremely labor and time intensive.

363 Lao PDR is currently undergoing vast environmental, demographic, and economic changes. Road  
364 networks are increasing in range and density and several areas (i.e. Vientiane, Savannakhet) are  
365 undergoing expansive urbanization [28]. These environmental changes will most likely result in shifting  
366 patterns of infectious diseases. As the region undergoes urbanization (including both a decrease in  
367 urban landscape and movement of human populations to urban centers), pathogens that thrive in rural  
368 areas (e.g. JEV) may undergo reduced transmission, especially if vaccine campaigns are more capable of  
369 reaching rural populations. Conversely, infections that cluster in urban and peri-urban areas (such as  
370 dengue and murine typhus) may increase in frequency.

371 Several environmental indices from remote sensing instruments have shown potential for  
372 predicting disease risk, differentiating disease types, or for other surveillance efforts in SE Asia [29,30]  
373 and globally [31–35]. This analysis, and others like it, illustrates the ability to differentiate some  
374 infections (namely JEV when compared to other diagnoses) through the use of freely available data (i.e.  
375 MODIS) and software (R and QGIS) and routinely collected healthcare data. Surveillance systems and  
376 potentially diagnostic algorithms [36] in developing settings could benefit from inclusion of such  
377 resources. A far-reaching surveillance system that is representative of the entire nation and includes  
378 likely CNS infections would be beneficial in order to assess the true burden of CNS infections – many of  
379 which would benefit from primary and secondary prevention through increased provision of vaccines,  
380 vector control, and early diagnosis and treatment. Given the inherent difficulties in accurately  
381 diagnosing and treating CNS infections, the predictors reported here and from other epidemiological  
382 studies for major contributors to CNS diseases (i.e. age, seasonality, location, and environmental

383 characteristics) could be considered alongside clinical symptomology when presumptive diagnoses are  
384 being made. However, it will be important to consider current and ongoing demographic,  
385 environmental, and economic changes in Lao PDR.

386 Finally, increasing population access to vaccines, diagnosis, and treatment would have clear  
387 benefits to overall population health. As with other parts of the developing world, a large fraction of the  
388 Lao population must travel long distances in order to reach primary healthcare centers. In 2005 73% of  
389 the Lao population was reported to live in rural areas, 21% without roads. By 2015 67% of the  
390 population were reported to live in rural villages with 8% in villages without roads [37]. For many  
391 communities, travel during the wet season remains difficult. Travel costs can also be prohibitive. Most of  
392 the CNS infections in this analysis occurred or developed symptoms during the wet season. Public  
393 health initiatives that help to decrease the distances between communities and the healthcare services  
394 that they need are warranted.

395

396

### 397 **Acknowledgements**

398 We are very grateful to the patients and to Bounthaphany Bounxouei, past Director of Mahosot  
399 Hospital; to Bounnack Saysanasongkham, Director of Department of Health Care, Ministry of Health; to  
400 H.E. Bounkong Syhavong, Minister of Health, Lao PDR; to the staff of the Infectious Disease Center and  
401 Microbiology Laboratory for their help and support.

### 402 **Funding**

403 This study was supported by the European Commission Innovate program (ComAcross project, grant no.  
404 DCI-ASIE/2013/315-047). The work of LOMWRU, PN and MM are funded by the Wellcome Trust of Great  
405 Britain, grant 106698/Z/14/Z. Travel to Lao PDR to support DMP for this research was obtained through  
406 a University of California Council on Research, Computing, and Libraries (CORCL) Faculty Grant.



407

## 408 REFERENCES

- 409 1. Tarantola A, Goutard F, Newton P, de Lamballerie X, Lortholary O, Cappelle J, et al. Estimating the  
410 Burden of Japanese Encephalitis Virus and Other Encephalitides in Countries of the Mekong  
411 Region. *PLoS Neglected Tropical Diseases*. 2014;8: 4. doi:10.1371/journal.pntd.0002533
- 412 2. Glaser C a, Honarmand S, Anderson LJ, Schnurr DP, Forghani B, Cossen CK, et al. Beyond viruses:  
413 clinical profiles and etiologies associated with encephalitis. *Clinical infectious diseases*: an official  
414 publication of the Infectious Diseases Society of America. 2006;43: 1565–1577.  
415 doi:10.1086/509330
- 416 3. Glaser CA, Gilliam S, Schnurr D, Forghani B, Honarmand S, Khetsuriani N, et al. In Search of  
417 Encephalitis Etiologies: Diagnostic Challenges in the California Encephalitis Project, 1998–2000.  
418 *Clinical Infectious Diseases*. 2003;36: 731–742. doi:10.1086/367841
- 419 4. Solomon T, Michael BD, Smith PE, Sanderson F, Davies NWS, Hart IJ, et al. Management of  
420 suspected viral encephalitis in adults – Association of British Neurologists and British Infection  
421 Association National Guidelines. *Journal of Infection*. 2012;64: 347–373.  
422 doi:10.1016/j.jinf.2011.11.014
- 423 5. McGill F, Heyderman RS, Michael BD, Defres S, Beeching NJ, Borrow R, et al. The UK joint specialist  
424 societies guideline on the diagnosis and management of acute meningitis and meningococcal  
425 sepsis in immunocompetent adults. *Journal of Infection*. 2016;72: 405–438.  
426 doi:10.1016/j.jinf.2016.01.007
- 427 6. Bharucha T, Vickers S, Ming D, Lee SJ, Dubot-Pérès A, de Lamballerie X, et al. Association between  
428 reported aetiology of central nervous system infections and the speciality of study investigators—a  
429 bias compartmental syndrome? *Trans R Soc Trop Med Hyg*. 2017;111: 579–583.  
430 doi:10.1093/trstmh/try008
- 431 7. Kennedy PGE. Viral Encephalitis: Causes, Differential Diagnosis, and Management. *Journal of*  
432 *Neurology, Neurosurgery & Psychiatry*. 2004;75: i10–i15. doi:10.1136/jnnp.2003.034280
- 433 8. Olsen SJ, Campbell AP, Supawat K, Liamsuwan S, Chotpitayasunondh T, Laptikulthum S, et al.  
434 *Infectious Causes of Encephalitis and Meningoencephalitis*. 2015;21: 2003–2005.
- 435 9. Dittrich S, Rattanaovong S, Lee SJ, Panyanivong P, Craig SB, Tulsiani SM, et al. *Orientia*, *rickettsia*,  
436 and *leptospira* pathogens as causes of CNS infections in Laos: A prospective study. *The Lancet*  
437 *Global Health*. 2015;3: e104–e112. doi:10.1016/S2214-109X(14)70289-X
- 438 10. Mai NTH, Phu NH, Nhu LNT, Hong NTT, Hanh NHH, Nguyet LA, et al. Central Nervous System  
439 Infection Diagnosis by Next-Generation Sequencing: A Glimpse Into the Future? *Open Forum Infect*  
440 *Dis*. 2017;4. doi:10.1093/ofid/ofx046
- 441 11. Turner P, Suy K, Tan LV, Sar P, Miliya T, Hong NTT, et al. The aetiologies of central nervous system  
442 infections in hospitalised Cambodian children. *BMC Infect Dis*. 2017;17. doi:10.1186/s12879-017-  
443 2915-6

- 444 12. Ho NT, Hoang VMT, Le NNT, Nguyen DT, Tran A, Kaki D, et al. A spatial and temporal analysis of  
445 paediatric central nervous system infections from 2005 to 2015 in Ho Chi Minh City, Vietnam.  
446 *Epidemiology and Infection*. 2017;145: 3307–3317. doi:10.1017/S095026881700228X
- 447 13. Mawuntu AHP, Bernadus JBB, Dhenni R, Wiyatno A, Anggreani R, Feliana, et al. Detection of  
448 central nervous system viral infections in adults in Manado, North Sulawesi, Indonesia. *PLOS ONE*.  
449 2018;13: e0207440. doi:10.1371/journal.pone.0207440
- 450 14. Dubot-Pérès A, Mayxay M, Phetsouvanh R, Lee SJ, Rattnavong S, Vongsouvath M, et al.  
451 Management of Central Nervous System Infections, Vientiane, Laos, 2003–2011 - Volume 25,  
452 Number 5—May 2019 - *Emerging Infectious Diseases journal* - CDC. doi:10.3201/eid2505.180914
- 453 15. Boschetti M, Nutini F, Manfron G, Brivio PA, Nelson A. Comparative analysis of normalised  
454 difference spectral indices derived from MODIS for detecting surface water in flooded rice  
455 cropping systems. *PLoS ONE*. 2014;9. doi:10.1371/journal.pone.0088741
- 456 16. Lao Population and Housing Census 2015: Provisional Report [Internet]. Ministry of Planning and  
457 Investment Lao Statistics Bureau; 2015 Dec p. 64. Available:  
458 <https://lao.unfpa.org/sites/default/files/pub-pdf/Final%20report-editting-English1.pdf>
- 459 17. Vallé J, Thaojaikong T, Moore CE, Phetsouvanh R, Richards AL, Souris M, et al. Contrasting spatial  
460 distribution and risk factors for past infection with scrub typhus and murine typhus in Vientiane  
461 city, Lao PDR. *PLoS Neglected Tropical Diseases*. 2010;4: 1–10. doi:10.1371/journal.pntd.0000909
- 462 18. HO NT, HOANG VMT, LE NNT, NGUYEN DT, TRAN A, KAKI D, et al. A spatial and temporal analysis of  
463 paediatric central nervous system infections from 2005 to 2015 in Ho Chi Minh City, Vietnam.  
464 *Epidemiology and Infection*. 2017;145: 3307–3317. doi:10.1017/S095026881700228X
- 465 19. Campbell G, Hills S, Fischer M, Jacobson J, Hoke C, Hombach J, et al. Estimated global incidence of  
466 Japanese encephalitis: *Bulletin of the World Health Organization*. 2011;89: 766–774.  
467 doi:10.2471/BLT.10.085233
- 468 20. UNICEF. Japanese Encephalitis Vaccine Market and Supply Update. 2015;
- 469 21. Slavin MA, Chakrabarti A. Opportunistic fungal infections in the Asia-Pacific region. *Medical  
470 Mycology*. 2012;50: 18–25. doi:10.3109/13693786.2011.602989
- 471 22. Springer DJ, Chaturvedi V. Projecting global occurrence of *Cryptococcus gattii*. *Emerging Infectious  
472 Diseases*. 2010;16: 14–20. doi:10.3201/eid1601.090369
- 473 23. Ellis DH, Pfeiffer TJ. Ecology, life cycle, and infectious propagule of *Cryptococcus neoformans*. *The  
474 Lancet*. 1990;336: 923–925. doi:10.1016/0140-6736(90)92283-N
- 475 24. Castrodale LJ, Gerlach RF, Preziosi DE, Frederickson P, Lockhart SR. Prolonged incubation period for  
476 *cryptococcus gattii* infection in cat, Alaska, USA. *Emerging Infectious Diseases*. 2013;19: 1034–  
477 1035. doi:10.3201/eid1906.130006

- 478 25. Georgi A, Schneemann M, Tintelnot K, Calligaris-Maibach RC, Meyer S, Weber R, et al.  
479 *Cryptococcus gattii* meningoencephalitis in an immunocompetent person 13 months after  
480 exposure. *Infection*. 2009;37: 370–373. doi:10.1007/s15010-008-8211-z
- 481 26. Wright P, Inverarity D. Human immunodeficiency virus (HIV) related cryptococcol meningitis in  
482 rural Central Thailand-Treatment difficulties and prevention strategies. *SOUTHEAST ASIAN J TROP*  
483 *MED PUBLIC HEALTH*. 2007;38: 4.
- 484 27. Inverarity D, Bradshaw Q, Wright P, Grant A. The spectrum of HIV-related disease in rural Central  
485 Thailand. *SOUTHEAST ASIAN J TROP MED PUBLIC HEALTH*. 2002;33: 10.
- 486 28. Bank AD. Urban development in the Greater Mekong Subregion. Steinberg F, Hakim J, editors.  
487 Mandaluyong City, Philippines: Asian Development Bank; 2016. doi:10.1111/j.1467-  
488 9787.2010.00709.x
- 489 29. Ledien J, Sorn S, Hem S, Huy R, Buchy P, Tarantola A, et al. Assessing the performance of remotely-  
490 sensed flooding indicators and their potential contribution to early warning for leptospirosis in  
491 Cambodia. Schumann GJ-P, editor. *PLOS ONE*. 2017;12: e0181044.  
492 doi:10.1371/journal.pone.0181044
- 493 30. Chadsuthi S, Chalvet-Monfray K, Wiratsudakul A, Suwancharoen D, Cappelle J. A remotely sensed  
494 flooding indicator associated with cattle and buffalo leptospirosis cases in Thailand 2011–2013.  
495 *BMC Infectious Diseases*. 2018;18. doi:10.1186/s12879-018-3537-3
- 496 31. Rogers DJ, Randolph SE, Snow RW, Hay SI. Satellite imagery in the study and forecast of malaria.  
497 *Nature*. 2002;415: 710–715. doi:10.1038/415710a
- 498 32. Lambin EF, Tran A, Vanwambeke SO, Linard C, Soti V. Pathogenic landscapes: Interactions between  
499 land, people, disease vectors, and their animal hosts. *International Journal of Health Geographics*.  
500 2010;9: 54. doi:10.1186/1476-072X-9-54
- 501 33. Beck LR, Lobitz BM, Wood BL. Remote sensing and human health: new sensors and new  
502 opportunities. *Emerg Infect Dis*. 2000;6: 217–227.
- 503 34. Ford TE, Colwell RR, Rose JB, Morse SS, Rogers DJ, Yates TL. Using Satellite Images of  
504 Environmental Changes to Predict Infectious Disease Outbreaks. *Emerg Infect Dis*. 2009;15: 1341–  
505 1346. doi:10.3201/eid1509.081334
- 506 35. Lleo MM, Lafaye M, Guell A. Application of space technologies to the surveillance and modelling of  
507 waterborne diseases. *Curr Opin Biotechnol*. 2008;19: 307–312. doi:10.1016/j.copbio.2008.04.001
- 508 36. Pokharel S, White LJ, Aguas R, Celhay O, Pellé KG, Dittrich S. Algorithm in the diagnosis of febrile  
509 illness using pathogen-specific rapid diagnostic tests. *Clin Infect Dis*. doi:10.1093/cid/ciz665
- 510 37. Results of the Population and Housing Census 2015 [Internet]. Lao Statistics Bureau; 2016 p. 282.  
511 Available: [https://lao.unfpa.org/sites/default/files/pub-pdf/PHC-ENG-FNAL-WEB\\_0.pdf](https://lao.unfpa.org/sites/default/files/pub-pdf/PHC-ENG-FNAL-WEB_0.pdf)
- 512

513 **Supporting information legends**

514

515 **Supporting information file 1: Detailed explanation of variables and analyses**

516

517

518

519

520

521

522

523

524

525

526

527

528

529

530

531

532

533

534

535

536

537

538 **Table 1:** List of variables, their spatial and temporal scales, and transformations

539

| Variable                      | description                                                                                                                                                                                                                                                                           | spatial scale                                                                                                                    | temporal scale                                                                                                                                                                                                                                                                                            | transformation                                                                                                    |
|-------------------------------|---------------------------------------------------------------------------------------------------------------------------------------------------------------------------------------------------------------------------------------------------------------------------------------|----------------------------------------------------------------------------------------------------------------------------------|-----------------------------------------------------------------------------------------------------------------------------------------------------------------------------------------------------------------------------------------------------------------------------------------------------------|-------------------------------------------------------------------------------------------------------------------|
| <i>Village population</i>     | Population estimate of LP patient home village. This is calculated as a mean population value from the Lao PDR official census from years 2005 and 2015.                                                                                                                              |                                                                                                                                  |                                                                                                                                                                                                                                                                                                           | For multivariable regressions, this variable was centered on its mean and standardized by its standard deviation. |
| <i>Distance to major road</i> | This is the distance in meters from the LP patient home village and the nearest point on a major highway network, from the OpenStreetMaps map layer. This distance was transformed into kilometers and rounded to the nearest 5 kilometers in order to account for measurement error. | This distance was transformed into kilometers and rounded to the nearest 5 kilometers in order to account for measurement error. |                                                                                                                                                                                                                                                                                                           | For multivariable regressions, this variable was centered on its mean and standardized by its standard deviation. |
| <i>Village elevation</i>      | This is the elevation of the LP patient home village, calculated from a digital elevation model. It is in meters above sea level.                                                                                                                                                     | at village point                                                                                                                 |                                                                                                                                                                                                                                                                                                           | For multivariable regressions, this variable was centered on its mean and standardized by its standard deviation. |
| <i>NFI</i>                    | This is the normalized flooding index, described in detail in the Supporting materials.                                                                                                                                                                                               | Mean values at 2km, 5km, and 10km buffers around each village.                                                                   | For village level analysis: calculated as a mean value for the study duration. For individual level analysis: Calculated for the same month (same 16 day time period); the previous 2 months (mean of the previous 5 16 day intervals); and the previous year (mean of the previous 23 16 day intervals). | Aggregated into quartiles for multivariable regressions.                                                          |
| <i>NDVI</i>                   | This is the normalized difference vegetation index, detailed in the Supporting materials.                                                                                                                                                                                             | Mean values at 2km, 5km, and 10km buffers around each village.                                                                   | For village level analysis: calculated as a mean value for the study duration. For individual level analysis: Calculated for the same month (same 16 day time period); the previous 2 months (mean of the previous 5 16 day intervals); and the previous year (mean of the previous 23 16 day intervals). |                                                                                                                   |
| <i>EVI</i>                    | This is the enhanced vegetation index, detailed in the Supporting materials.                                                                                                                                                                                                          | Mean values at 2km, 5km, and 10km buffers around each village.                                                                   | For village level analysis: calculated as a mean value for the study duration. For individual level analysis: Calculated for the same month (same 16 day time period); the previous 2 months (mean of the previous 5 16 day intervals); and the previous year (mean of the previous 23 16 day intervals). | Aggregated into quartiles for multivariable regressions.                                                          |
| <i>Gender</i>                 | Binary for male or female, self reported in hospital records                                                                                                                                                                                                                          |                                                                                                                                  |                                                                                                                                                                                                                                                                                                           |                                                                                                                   |
| <i>Age</i>                    | Self reported age in years.                                                                                                                                                                                                                                                           |                                                                                                                                  |                                                                                                                                                                                                                                                                                                           | Aggregated into age groups for multivariable                                                                      |
| <i>Year</i>                   | The year of admission to the hospital                                                                                                                                                                                                                                                 |                                                                                                                                  |                                                                                                                                                                                                                                                                                                           | For multivariable regressions, this variable was centered on its mean and standardized by its standard deviation. |
| <i>Quarter</i>                | The calendar quarter of admission (Jan - March; Apr - June; July - Sep; Oct - Dec)                                                                                                                                                                                                    |                                                                                                                                  |                                                                                                                                                                                                                                                                                                           |                                                                                                                   |

540

541

542

543

544

545

546

547 **Table 2:** Age and gender of study patients. (Q1 and Q3 indicate the first and third quartiles,  
548 respectively).

549

|                                  | male/female | M/F ratio | median age in years (Q1 –Q3) | Total number |
|----------------------------------|-------------|-----------|------------------------------|--------------|
| <b>all patients</b>              | 666/399     | 1.67      | 23 (8 - 38)                  | 1065         |
| <b>JEV</b>                       | 55/39       | 1.41      | 13 (8 - 20)                  | 94           |
| <b><i>Cryptococcus</i> spp.</b>  | 40/30       | 1.33      | 33 (27 - 41)                 | 70           |
| <b>scrub typhus</b>              | 22/9        | 2.44      | 16 (9 - 29)                  | 31           |
| <b><i>Dengue virus</i></b>       | 22/5        | 4.4       | 20 (9 - 30)                  | 27           |
| <b><i>Leptospirosis</i> spp.</b> | 17/8        | 2.13      | 25 (12 - 39)                 | 25           |
| <b>murine typhus</b>             | 17/7        | 2.43      | 32 (16 - 51)                 | 24           |

550

551

552

553

554 **Table 3:** Distribution of distances (in km) to the nearest major road, by diagnosis type. Counts of villages  
555 are from within 3 standard deviational ellipses (SDEs) of all LP villages (referred to as the “study area” in  
556 text). In some cases, multiple patients came from the same village meaning that counts of villages will  
557 be smaller than counts of total patients. (Q1 and Q3 indicate the first and third quartiles, respectively).

558

|                                       | n    | median distance in km (Q1 - Q3) |
|---------------------------------------|------|---------------------------------|
| <b>All</b>                            | 6416 | 5.4 (0.5 - 15.2)                |
| <b>Villages without study patient</b> | 5847 | 6.3 (0.8 - 16.1)                |
| <b>Villages with study patient</b>    | 569  | 0.7 (0.1 - 4.1)                 |
| <b>JEV</b>                            | 88   | 0.6 (0.1 - 8.0)                 |
| <b><i>Cryptococcus</i> spp.</b>       | 66   | 0.3 (0.1 - 1.4)                 |
| <b>scrub typhus</b>                   | 31   | 0.6 (0.2 - 3.5)                 |
| <b><i>Dengue virus</i></b>            | 27   | 0.3 (0.1 - 1.1)                 |
| <b><i>Leptospirosis</i> spp.</b>      | 22   | 0.4 (0.1 - 1.9)                 |
| <b>murine typhus</b>                  | 24   | 0.3 (0.1 - 2.2)                 |

559

560

561 **Table 4:** Logistic regression and model adjusted odds ratios (AOR) for village level analysis of LP villages

562

| covariate              | total | LP count | AOR (CI)                  |
|------------------------|-------|----------|---------------------------|
| NDFI Q1                | 1604  | 68       | reference group           |
| NDFI Q2                | 1604  | 75       | 1.07 (0.73 - 1.56)        |
| NDFI Q3                | 1604  | 130      | <b>1.48 (1.03 - 2.16)</b> |
| NDFI Q4                | 1604  | 296      | <b>2.21 (1.49 - 3.31)</b> |
| EVI Q1                 | 1604  | 311      | reference group           |
| EVI Q2                 | 1604  | 134      | 1.16 (0.86 - 1.57)        |
| EVI Q3                 | 1604  | 74       | 1.12 (0.76 - 1.66)        |
| EVI Q4                 | 1604  | 50       | 1.19 (0.74 - 1.91)        |
| Village population     |       |          | <b>2.22 (2.03 - 2.42)</b> |
| Elevation              |       |          | <b>0.52 (0.42 - 0.63)</b> |
| Distance to major road |       |          | <b>0.68 (0.57 - 0.80)</b> |

563

564 **Table 5:** Logistic regression and model adjusted odds ratios (AOR) for village level analysis of JEV villages

| covariate              | total | JEV count | AOR (CI)                  |
|------------------------|-------|-----------|---------------------------|
| NDFI Q1                | 1604  | 18        | reference group           |
| NDFI Q2                | 1604  | 15        | 0.83 (0.38 - 1.76)        |
| NDFI Q3                | 1604  | 20        | 1.11 (0.53 - 2.35)        |
| NDFI Q4                | 1604  | 35        | 1.26 (0.54 - 2.95)        |
| EVI Q1                 | 1604  | 35        | reference group           |
| EVI Q2                 | 1604  | 23        | 1.81 (0.87 - 3.76)        |
| EVI Q3                 | 1604  | 17        | 1.85 (0.77 - 4.46)        |
| EVI Q4                 | 1604  | 13        | 1.76 (0.63 - 4.93)        |
| Village population     |       |           | <b>1.74 (1.55 - 1.96)</b> |
| Elevation              |       |           | <b>0.69 (0.46 - 0.97)</b> |
| Distance to major road |       |           | 0.88 (0.62 - 1.20)        |

565

566

567

568

569

570

571

572 **Table 6:** Mixed effects logistic regression and model adjusted odds ratios (AOR) for individual level  
 573 analysis

|                        |              |                  | <b>M1</b>                  | <b>M2</b>                  | <b>M3</b>                  |
|------------------------|--------------|------------------|----------------------------|----------------------------|----------------------------|
| <b>covariate</b>       | <b>total</b> | <b>JEV count</b> | <b>AOR (CI)</b>            | <b>AOR (CI)</b>            | <b>AOR (CI)</b>            |
| NDFI Q1                | 262          | 7                | reference group            | reference group            | reference group            |
| NDFI Q2                | 261          | 16               | <b>2.91 (1.06 - 7.97)</b>  | 2.28 (0.86 - 6.01)         | 2.32 (0.87 - 6.19)         |
| NDFI Q3                | 261          | 31               | <b>2.73 (1.02 - 7.28)</b>  | <b>2.75 (1.07 - 7.07)</b>  | <b>2.98 (1.13 - 7.85)</b>  |
| NDFI Q4                | 262          | 38               | <b>3.41 (1.17 - 9.94)</b>  | <b>3.12 (1.09 - 8.90)</b>  | <b>3.06 (1.04 - 8.96)</b>  |
| EVI Q1                 | 262          | 8                | reference group            | reference group            | reference group            |
| EVI Q2                 | 261          | 20               | 2.11 (0.84 - 5.28)         | 1.89 (0.76 - 4.74)         | 1.60 (0.63 - 4.04)         |
| EVI Q3                 | 261          | 24               | 2.04 (0.81 - 5.12)         | 1.65 (0.67 - 4.07)         | 1.33 (0.53 - 3.32)         |
| EVI Q4                 | 262          | 40               | <b>4.19 (1.62 - 10.87)</b> | <b>3.44 (1.35 - 8.73)</b>  | 2.43 (0.91 - 6.46)         |
| Jan - March            | 210          | 2                | reference group            | reference group            | reference group            |
| April - June           | 267          | 22               | <b>5.12 (1.10 - 23.89)</b> | 4.45 (0.95 - 20.76)        | <b>5.05 (1.07 - 23.73)</b> |
| July - Sep             | 333          | 62               | <b>8.72 (1.75 - 43.46)</b> | <b>6.35 (1.26 - 31.89)</b> | <b>7.40 (1.45 - 37.67)</b> |
| Oct - Dec              | 253          | 8                | 1.80 (0.35 - 9.25)         | 1.51 (0.29 - 7.81)         | 1.54 (0.29 - 8.17)         |
| Year                   |              |                  | <b>1.31 (1.03 - 1.68)</b>  | <b>1.34 (1.05 - 1.72)</b>  | 1.27 (0.98 - 1.64)         |
| 0 through 4            | 208          | 13               |                            | reference group            | reference group            |
| 5 through 14           | 150          | 37               |                            | <b>3.00 (1.46 - 6.18)</b>  | <b>2.74 (1.31 - 5.69)</b>  |
| 15 through 24          | 192          | 28               |                            | 1.74 (0.84 - 3.62)         | 1.37 (0.64 - 2.94)         |
| 25 through 34          | 186          | 10               |                            | 0.66 (0.27 - 1.61)         | 0.61 (0.25 - 1.48)         |
| 35 through 44          | 133          | 4                |                            | <b>0.26 (0.07 - 0.96)</b>  | <b>0.26 (0.07 - 0.97)</b>  |
| 45 plus                | 196          | 2                |                            | <b>0.11 (0.02 - 0.52)</b>  | <b>0.10 (0.02 - 0.47)</b>  |
| female                 | 399          | 39               |                            | reference group            | reference group            |
| male                   | 666          | 55               |                            | 0.97 (0.60 - 1.58)         | 1.08 (0.66 - 1.79)         |
| Village population     |              |                  |                            |                            | 1.00 (0.77 - 1.29)         |
| Elevation              |              |                  |                            |                            | <b>1.36 (1.11 - 1.66)</b>  |
| Distance to major road |              |                  |                            |                            | 1.08 (0.88 - 1.32)         |

574  
 575  
 576  
 577  
 578  
 579  
 580  
 581



582 **FIGURES**

583

584 **Figure 1:** Spatial distributions of the home villages of study patients, for A: all study patients, B: study  
585 patients with JEV infections, and C: with cryptococcal infections, D: scrub typhus infections, E: with  
586 *dengue virus* infections, F: with leptospiral infections, and G: with murine typhus infections. SDDs and  
587 SDEs are weighted by case numbers, with some patients coming from the same village. Maps were  
588 created using QGIS version 3.4.9. All layers were created by the authors of this manuscript.

589

590 **Figure 2:** Environmental indices for villages with study patient homes for the duration of the study  
591 period (January 2003 through August 2011) for all study patient villages, non study patient villages in the  
592 study area, and for major diagnoses (JEV = Japanese Encephalitis virus; Crypto = cryptococcal infection;  
593 ST = scrub typhus; MT = murine typhus; dengue = *Dengue virus*; lepto = *Leptospira* spp. infection). Bar  
594 values are mean values and the error bars are 95% confidence intervals, using the t-distribution. NFI  
595 values here have a constant (0.25) added to them for visualization only.

596

597 **Figure 3:** Environmental indices for study patients by major diagnosis and at different times leading up  
598 to the date of admission. JEV = Japanese Encephalitis virus; Crypto = cryptococcal infection; ST = scrub  
599 typhus; MT = murine typhus; dengue = *Dengue virus*; lepto = *Leptospira* spp. infection. Bar values are  
600 mean values and the error bars are 95% confidence intervals, using the t-distribution. NFI values here  
601 have a constant (0.25) added to them for visualization only.

602

603
